# Supplementary material for: Automated Dentate Nucleus Segmentation from QSM Images Using Deep Learning
Source: bioRxiv or medRxiv preprint supplement (doi:10.1101/2024.06.17.24308662), 2024-06-28
Supplement: Supplementary file [file media-1.pdf]

# Supplementary Material

**Title:** Automated Dentate Nucleus Segmentation from QSM Images Using Deep Learning

**Author names and affiliations:** Diogo H Shiraishi<sup>1\*</sup>, Susmita Saha<sup>2,3\*</sup>, Isaac M Adanyeguh<sup>4</sup>, Sirio Coccozza<sup>5</sup>, Louise A Corben<sup>6,7,2</sup>, Andreas Deistung<sup>8,9</sup>, Martin B Delatycki<sup>6</sup>, Imis Dogan<sup>10,11</sup>, William Gaetz<sup>12</sup>, Nellie Georgiou-Karistianis<sup>2</sup>, Simon Graf<sup>8</sup>, Marina Grisoli<sup>13</sup>, Pierre-Gilles Henry<sup>4</sup>, Gustavo M Jarola<sup>1</sup>, James M Joers<sup>4</sup>, Christian Langkammer<sup>14</sup>, Christophe Lenglet<sup>4</sup>, Jiakun Li<sup>15</sup>, Camila C Lobo<sup>1</sup>, Eric F Lock<sup>15</sup>, David R Lynch<sup>16</sup>, Thomas H Mareci<sup>17</sup>, Alberto R M Martinez<sup>1</sup>, Serena Monti<sup>18</sup>, Anna Nigri<sup>13</sup>, Massimo Pandolfo<sup>19</sup>, Kathrin Reetz<sup>10,11</sup>, Timothy P Roberts<sup>12</sup>, Sandro Romanzetti<sup>10</sup>, David A Rudko<sup>19,20,21</sup>, Alessandra Scaravilli<sup>5</sup>, Jörg B Schulz<sup>10,11</sup>, S H Subramony<sup>22</sup>, Dagmar Timmann<sup>23</sup>, Marcondes C França<sup>1</sup>, Ian H Harding<sup>26,27†</sup>, Thiago J R Rezende<sup>1†</sup>, TRACK-FA Neuroimaging Consortium<sup>‡</sup>

1 Department of Neurology, School of Medical Sciences, University of Campinas (Unicamp), Campinas, Brazil

2 School of Psychological Sciences, The Turner Institute for Brain and Mental Health, Monash University, Clayton, Victoria, Australia

3 Department of Neuroscience, School of Translational Medicine, Monash University, Melbourne, Australia

4 Center for Magnetic Resonance Research, Department of Radiology, University of Minnesota, Minneapolis, Minnesota, United States of America

5 Department of Advanced Biomedical Sciences, University of Naples Federico II, Naples, Italy

6 Bruce Lefroy Centre for Genetic Health Research, Murdoch Children's Research Institute, Parkville, Victoria, Australia

7 Department of Paediatrics, University of Melbourne, Parkville, Victoria, Australia

8 University Clinic and Outpatient Clinic for Radiology, Department for Radiation Medicine, University Hospital Halle (Saale), University Medicine Halle, Halle (Saale), Germany

9 Halle MR Imaging Core Facility, Medical Faculty, Martin-Luther-University Halle-Wittenberg, Halle (Saale), Germany

10 Department of Neurology, RWTH Aachen University, Aachen, Germany

11 JARA-BRAIN Institute Molecular Neuroscience and Neuroimaging, Forschungszentrum Jülich GmbH and RWTH Aachen University, Aachen, Germany

12 Department of Radiology, Children's Hospital of Philadelphia, Philadelphia, Pennsylvania, United States of America

13 Department of Neuroradiology, Fondazione IRCCS Istituto Neurologico Carlo Besta, Milan, Italy

14 Department of Neurology, Medical University of Graz, Graz, Austria

15 Division of Biostatistics and Health Data Science, School of Public Health, University of Minnesota, Minneapolis, Minnesota, United States of America

16 Department of Neurology, Children's Hospital of Philadelphia, Philadelphia, Pennsylvania, United States of America

17 Department of Biochemistry and Molecular Biology, University of Florida, Gainesville, Florida, United States of America

18 Institute of Biostructures and Bioimaging, Italian National Research Council, Naples, Italy

19 Department of Neurology and Neurosurgery, McGill University, Montreal, Quebec, Canada

20 McConnell Brain Imaging Centre, Montreal Neurological Institute and Hospital, Montreal, Quebec, Canada

21 Department of Biomedical Engineering, McGill University, Montreal, Quebec, Canada

22 Department of Neurology and the Fixel Institute for Neurological Diseases, University of Florida, Gainesville, Florida, United States of America

23 Department of Neurology and Center for Translational and Behavioral Neuroscience (C-TNBS), Essen University Hospital, University of Duisburg-Essen, Essen, Germany

24 QIMR Berghofer Medical Research Institute, Brisbane, Queensland, Australia

25 School of Translational Medicine, Monash University, Melbourne, Australia

\* *Contributed equally*

† *Senior principal investigator*

## Deep learning model training specifications

The models explored in the architecture experimentation task included U-Net<sup>1</sup> with deep supervision (DS)<sup>2</sup>, Swin UNETR<sup>3</sup>, and the nnU-Net framework<sup>4</sup>. U-Net with DS started with feature channels at 32, doubling up to a value of 512. Each level combined two 3x3x3 convolutions, followed by instance normalization<sup>5</sup> and Leaky Rectified Linear Unit (Leaky ReLU)<sup>6</sup> activation with a slope of 0.01. A Stochastic Gradient Descent (SGD) optimizer with a learning rate of  $3 \times 10^{-2}$  and a Nesterov momentum<sup>7,8</sup> of 0.99 was used, combined with a Dice loss function for training. The learning rate was decayed using a polynomial function scheduler. Training lasted 600 epochs with a batch size of 1. The original Swin UNETR implementation was configured with a feature size of 24. An AdamW<sup>9</sup> optimizer was selected with a learning rate of  $1 \times 10^{-4}$ , weight decay of  $1 \times 10^{-5}$ ,  $\beta_1 = 0.9$ ,  $\beta_2 = 0.999$ , and  $\epsilon = 1 \times 10^{-8}$ . For the loss function, we used the Dice loss. A cosine annealing learning rate scheduler was set. The network was trained for 1000 epochs and a batch size of 1. Finally, the nnU-Net framework was trained using the default settings for the 3D full resolution trainer. For both U-Net with DS and Swin UNETR, a same set of augmentation techniques were selected. To replicate the nnU-Net augmentation pipeline, we incorporated random rotation, shear, scaling, translation, flipping, elastic deformation, and gamma contrast methods.

## External Validation

**Table S1.** External validation datasets acquisition parameters.

| Dataset         | Scanner                  | Sequence | TR (ms) | TE1 (ms) | $\Delta$ TE (ms) | # of echoes | FoV (mm)                      | Image matrix (voxels) | Voxel size (mm)   | Acquisition time |
|-----------------|--------------------------|----------|---------|----------|------------------|-------------|-------------------------------|-----------------------|-------------------|------------------|
| TRACK-FA McGill | 3T Siemens Prisma        | GRE      | 27      | 3.7      | 6                | 4           | 220 x 220 x 176               | 208 x 256 x 176       | 0.86 iso          | 7' 22"           |
| Carlo Besta     | 3T Philips Achieva       | GRE      | 40      | 4.5      | 5                | 7           | 240 x 180<br>140 axial slices | 480 x 480 x 140       | 0.50 x 0.50 x 1.0 | 4' 23"           |
|                 | 3T Philips Achieva       | GRE      | 40      | 5.4      | 5.2              | 7           | 224 x 224<br>140 axial slices | 224 x 224 x 140       | 1.0 iso           | 8' 12"           |
| Graz            | 3T Siemens Magnetom Trio | GRE      | 68      | 4.92     | 4.92             | 12          | 188 x 230 x 128               | 208 x 256 x 64        | 0.90 x 0.90 x 2.0 | 4' 51"           |

GRE: gradient recalled echo; iso: isotropic; TR: repetition time; TE: echo time; TE1: first echo time; FoV: field of view; iso: isotropic.

**Table S2.** External validation datasets demographics.

|                  | McGill   |      | Carlo Besta | Graz      |
|------------------|----------|------|-------------|-----------|
|                  | Controls | FRDA | Controls    | MS        |
| <b>Subjects</b>  | 3        | 1    | 4           | 2         |
| <b>Age</b>       | 29.8±4.4 | 41   | 64.5±10.0   | 43.5±17.7 |
| <b>Sex (M/F)</b> | 2/1      | 0/1  | 1/3         | 1/1       |

FRDA: Friedreich's ataxia; MS: multiple sclerosis.

Ethics approval was obtained for the CMRR study: IRB 1210M22281 (University of Minnesota).

**Table S3.** Acquisition protocols for CMRR dataset.

| Dataset | Scanner                              | Sequence | TR (ms) | TE (ms)     | $\Delta$ TE (ms) | # of echoes | FoV (mm)            | Image matrix (voxels) | Voxel size (mm) | Acquisition time |
|---------|--------------------------------------|----------|---------|-------------|------------------|-------------|---------------------|-----------------------|-----------------|------------------|
| CMRR    | 3T Siemens<br>Magnetom<br>Prisma Fit | GRE      | 86      | 20.48/30/45 | -                | 3           | 205 x 186 x 32      | 232 x 256 x 32        | 0.80 iso        | 6' 59"           |
|         |                                      |          | 65      | 7.26 (TE1)  | 5.00             | 8           | 205 x 185 x (30-36) | 232 x 256 x (30-36)   | 0.80 iso        | 4' 40" - 5' 50"  |
|         |                                      |          | 65      | 7.26 (TE1)  | 5.00             | 8           | 174 x 192 x 36      | 174 x 192 x 36        | 1.0 iso         | 4' 38"           |
|         |                                      |          | 54      | 9.84 (TE1)  | 9.84             | 5           | 230 x 230 x 32      | 256 x 256 x 32        | 0.90 iso        | 4' 34"           |

MRI: magnetic resonance imaging; GRE: gradient recalled echo; iso: isotropic; TR: repetition time; TE: echo time; TE1: first echo time; FoV: field of view; iso: isotropic.

**Table S4.** Subject demographics for CMRR dataset.

|                  | CMRR      |          |
|------------------|-----------|----------|
|                  | Controls  | FRDA     |
| <b>Subjects</b>  | 3         | 16       |
| <b>Age</b>       | 25.0±11.1 | 23.6±9.0 |
| <b>Sex (M/F)</b> | 2/1       | 6/10     |

FRDA: Friedreich's ataxia.

## Segmentation Model Architectures Comparison

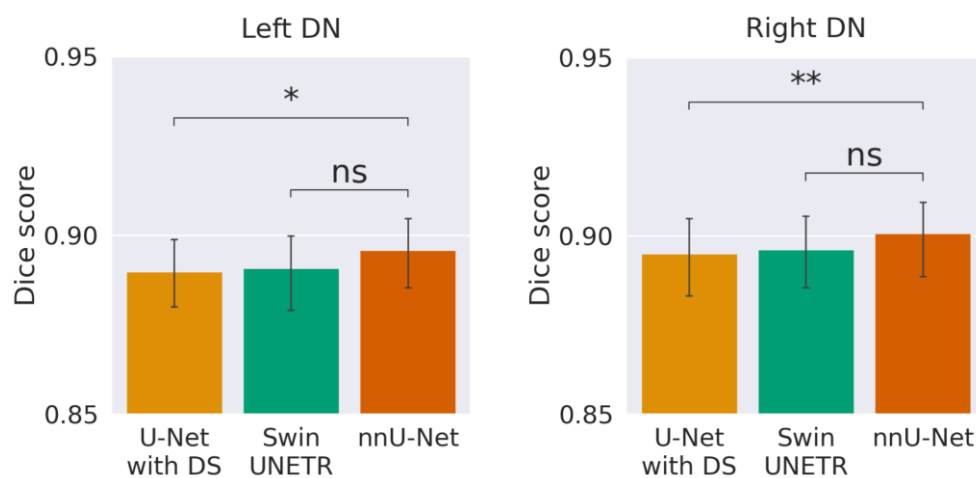

**Figure S1.** Bar plots of trained segmentation models. nnU-Net Dice score is statistically significantly higher than U-Net, and no significance was found when compared to Swin UNETR. ns: non-significant; \*  $p < 0.05$ ; \*\*  $p < 0.01$ ; \*\*\*  $p < 0.001$ ; \*\*\*\*  $p < 0.0001$ .

## DN Volume versus Mean Magnetic Susceptibility

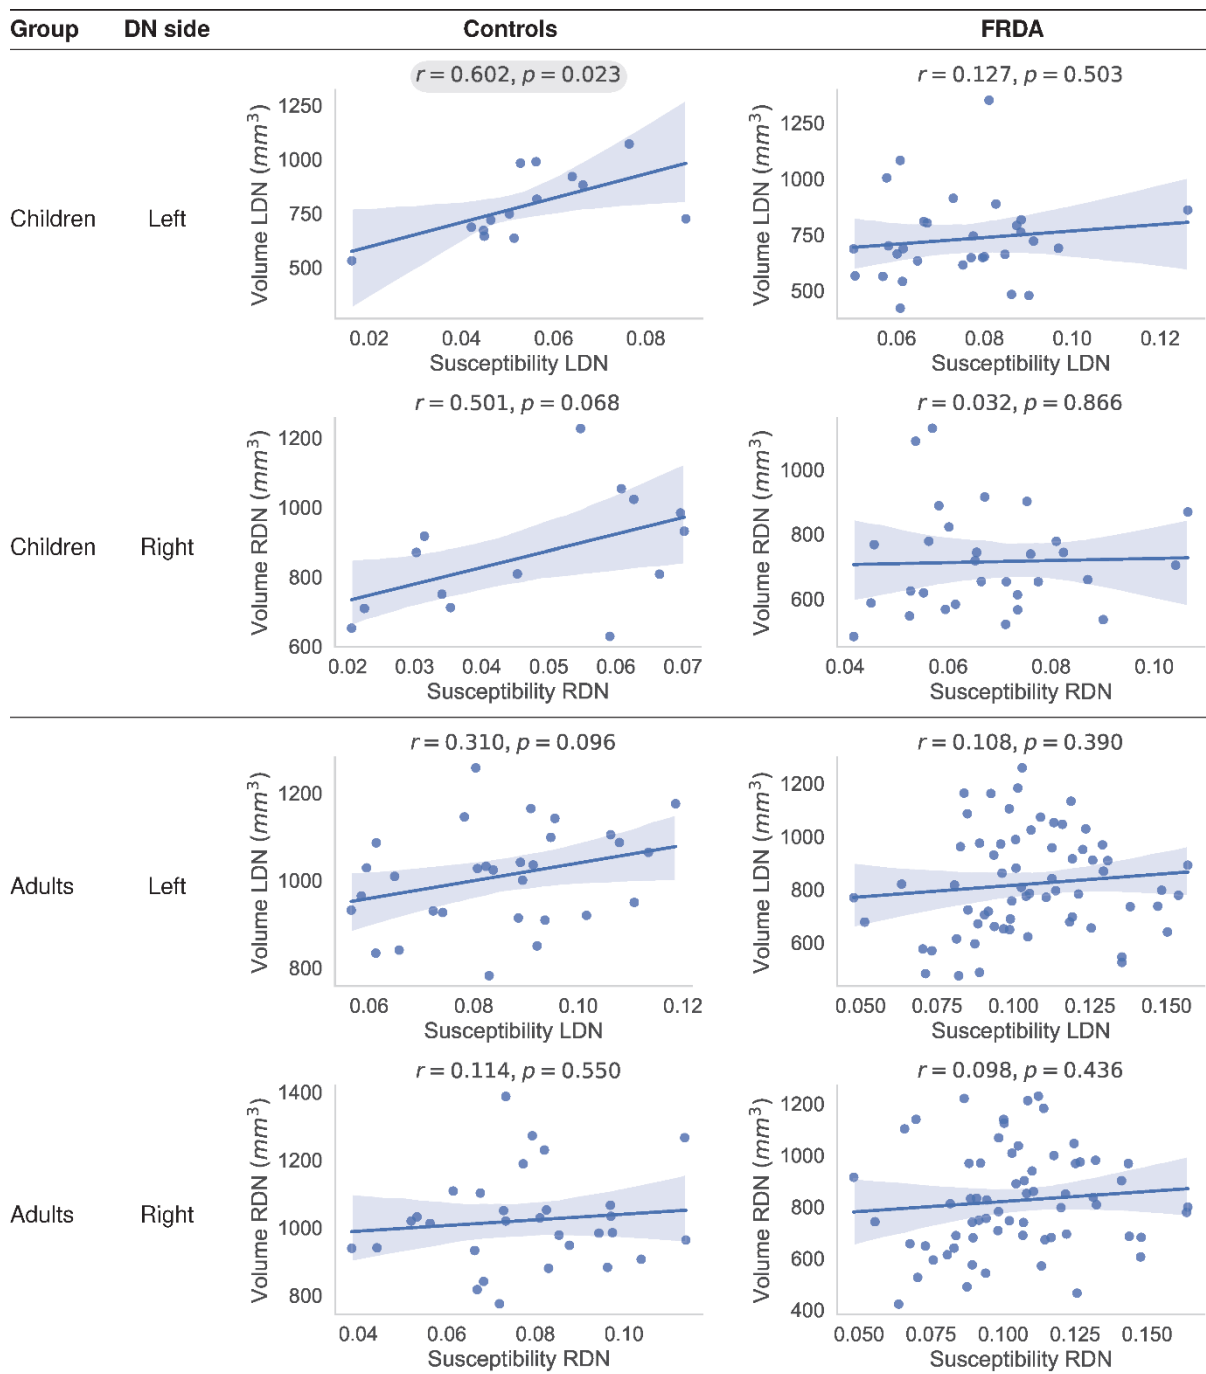

**Figure S2.** Manual segmentation results. Pearson's correlation coefficients and p-values for each group of individuals and DN side. Correlation coefficients with  $p < 0.05$  are emphasized with a gray background. Children: subjects under 18 years of age. The volume estimations were corrected for age and head size (eTIV). FRDA: Friedreich's ataxia; DN: dentate nucleus; LDN: left DN; RDN: right DN; Vol: volume.

## References

- 1 Çiçek, Ö., Abdulkadir, A., Lienkamp, S. S., Brox, T. & Ronneberger, O. in *Medical Image Computing and Computer-Assisted Intervention–MICCAI 2016: 19th International Conference, Athens, Greece, October 17-21, 2016, Proceedings, Part II* 19. 424-432 (Springer).
- 2 Lee, C.-Y., Xie, S., Gallagher, P., Zhang, Z. & Tu, Z. in *Artificial intelligence and statistics*. 562-570 (Pmlr).
- 3 Hatamizadeh, A. *et al.* in *International MICCAI Brainlesion Workshop*. 272-284 (Springer).
- 4 Isensee, F., Jaeger, P. F., Kohl, S. A. A., Petersen, J. & Maier-Hein, K. H. nnU-Net: a self-configuring method for deep learning-based biomedical image segmentation. *Nat Methods* **18**, 203-211 (2021). <https://doi.org/10.1038/s41592-020-01008-z>
- 5 Ulyanov, D., Vedaldi, A. & Lempitsky, V. Instance normalization: The missing ingredient for fast stylization. *arXiv preprint arXiv:1607.08022* (2016).
- 6 Maas, A. L., Hannun, A. Y. & Ng, A. Y. in *Proc. icml*. 3 (Atlanta, GA).
- 7 Sutskever, I., Martens, J., Dahl, G. & Hinton, G. in *International conference on machine learning*. 1139-1147 (PMLR).
- 8 Nesterov, Y. A method of solving a convex programming problem with convergence rate  $O(1/k^{** 2})$ . *Doklady Akademii Nauk SSSR* **269**, 543 (1983).
- 9 Loshchilov, I. & Hutter, F. Decoupled weight decay regularization. *arXiv preprint arXiv:1711.05101* (2017).
